# Supplementary material for: Worldwide Phylogenetic Distributions and Population Dynamics of the Genus Histoplasma
Source: PubMed Central journal article supplement (PMC4889077; doi:10.1371/journal.pntd.0004732), 2016-06-01

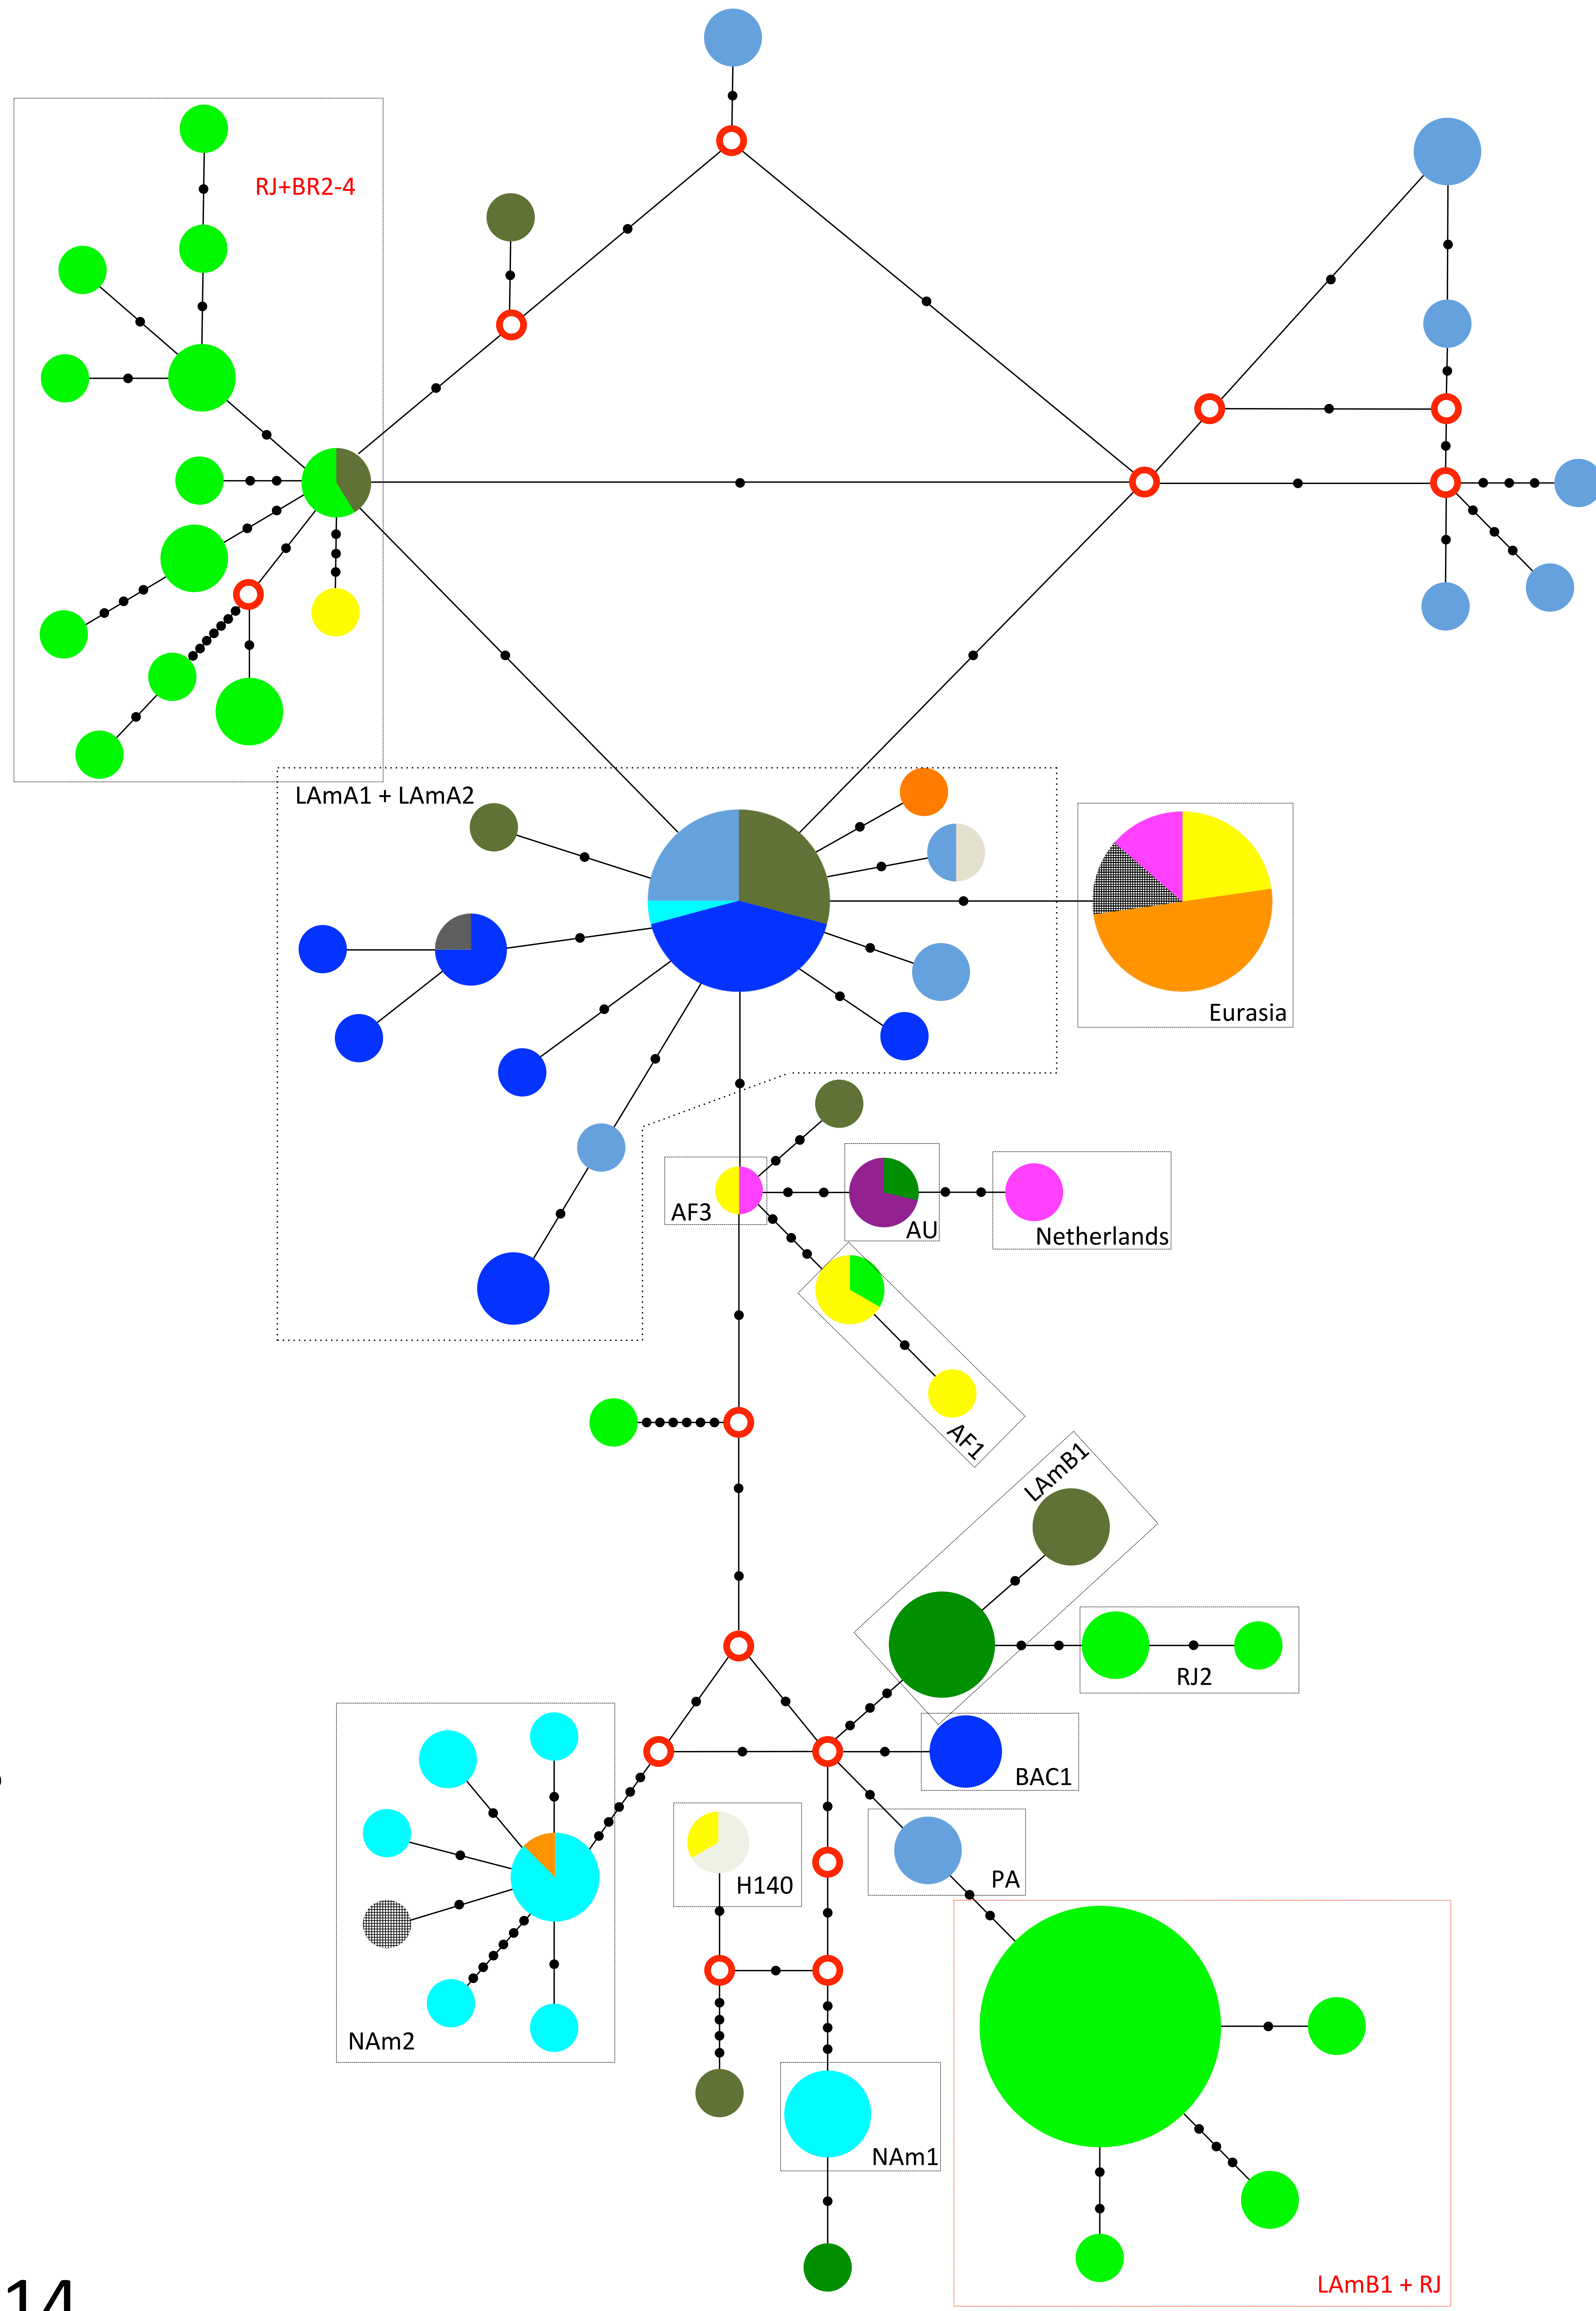

*arf* locus

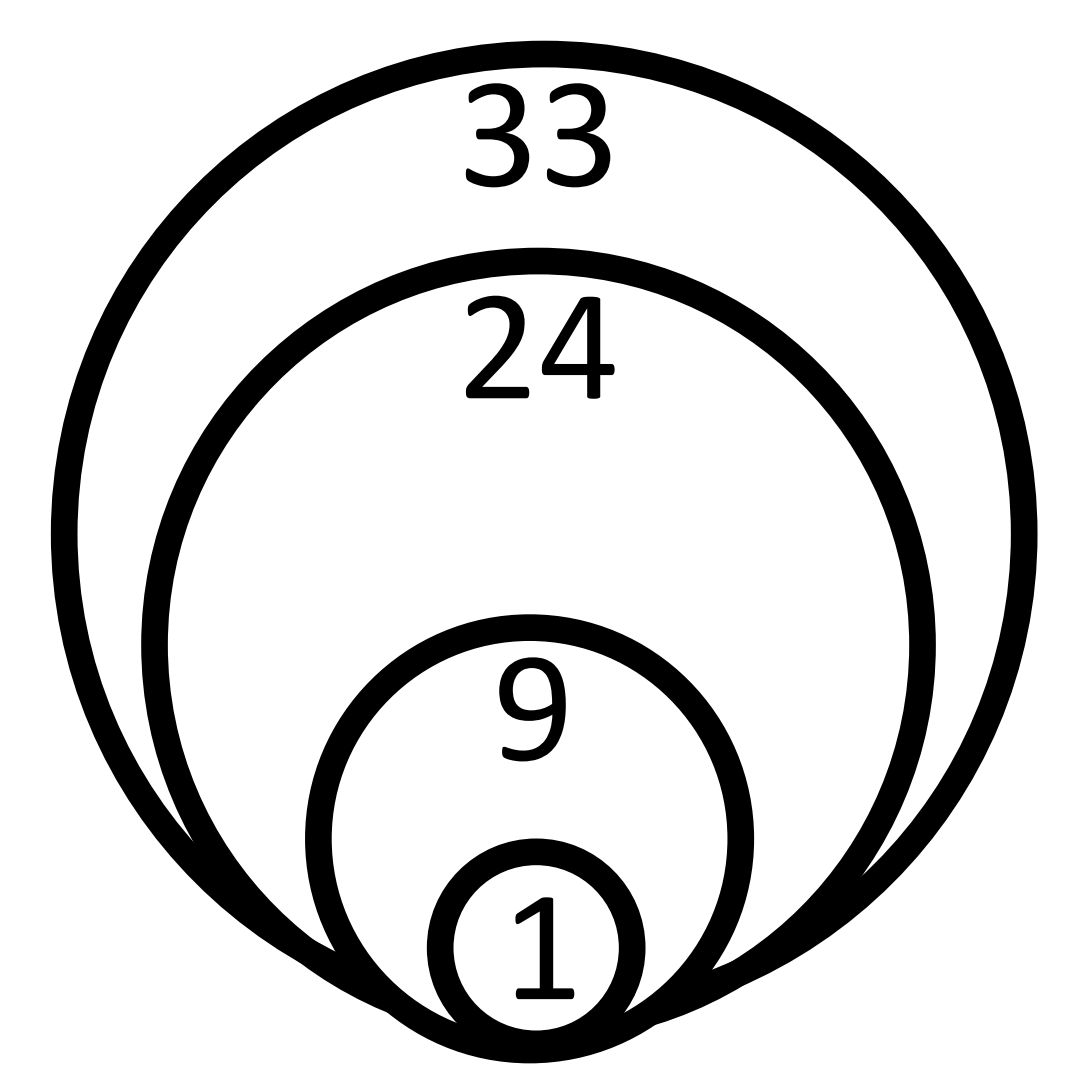

$h=62$

$Hd=0,9414$

LAmB1 + RJ

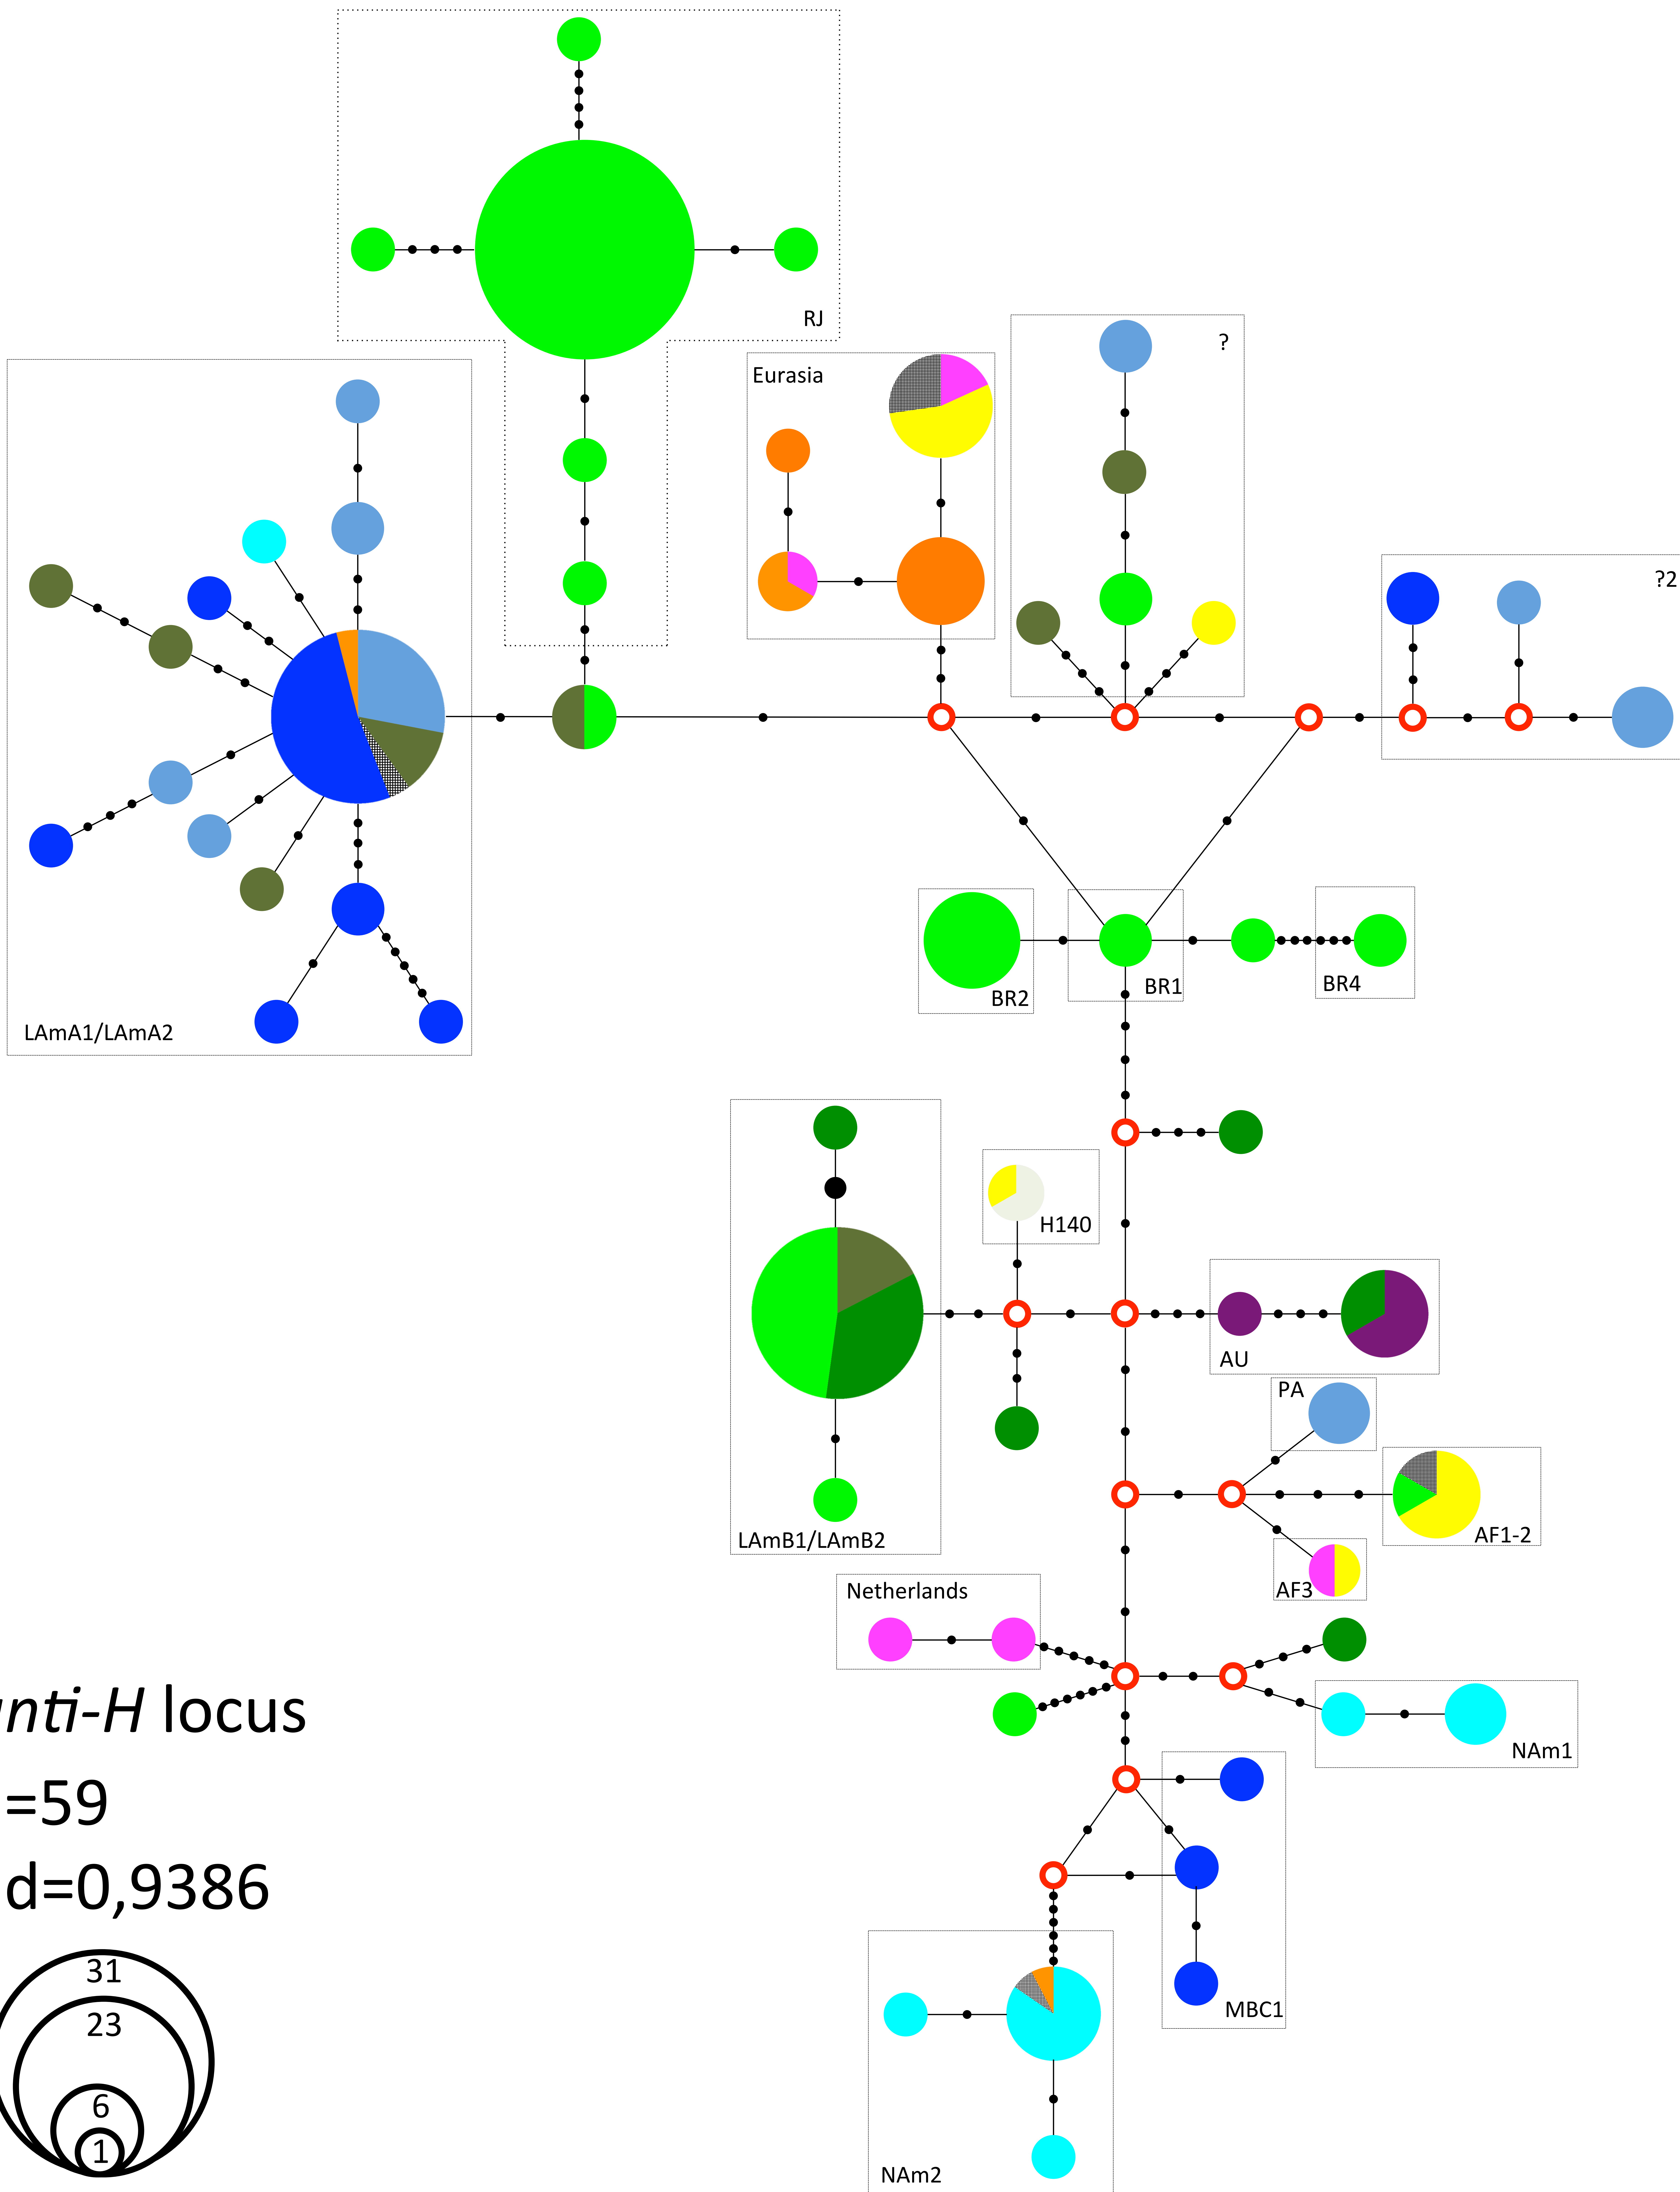

*anti-H* locus

h=59

hd=0,9386

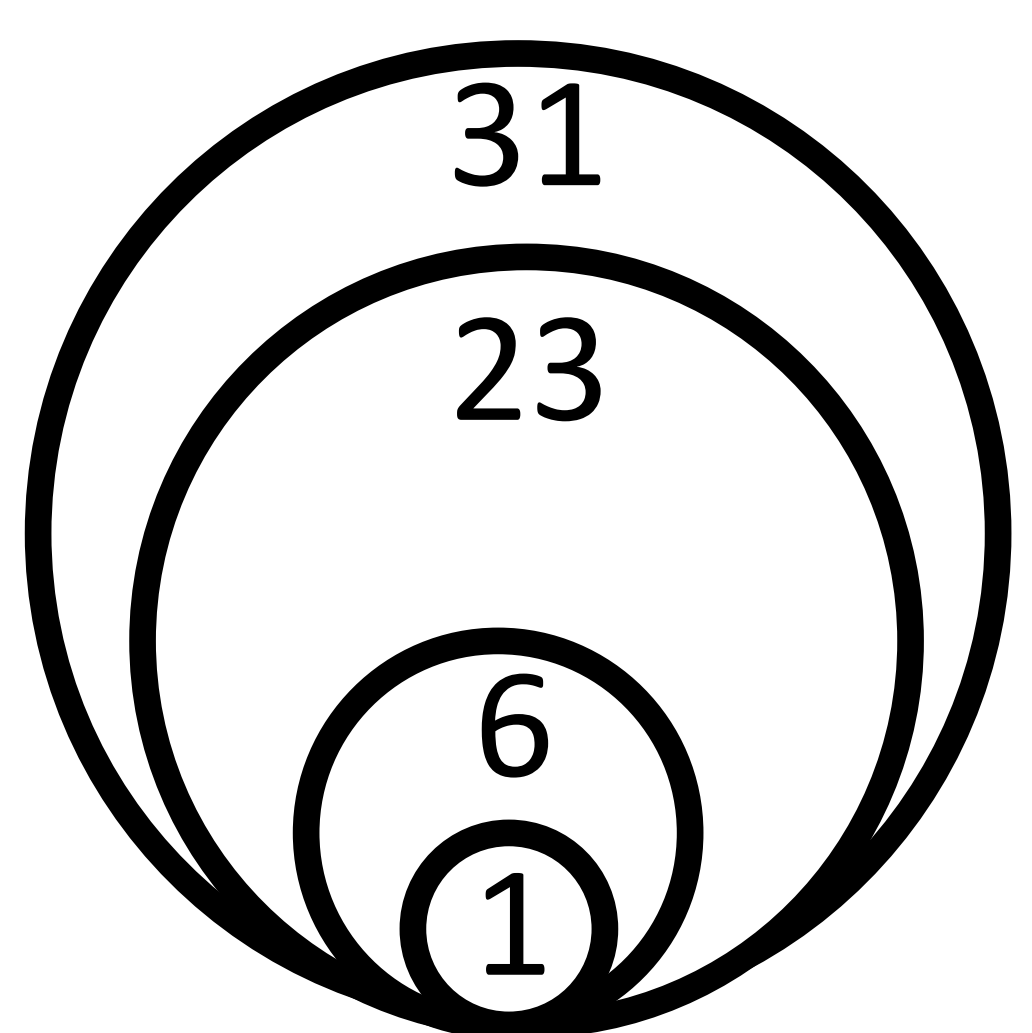



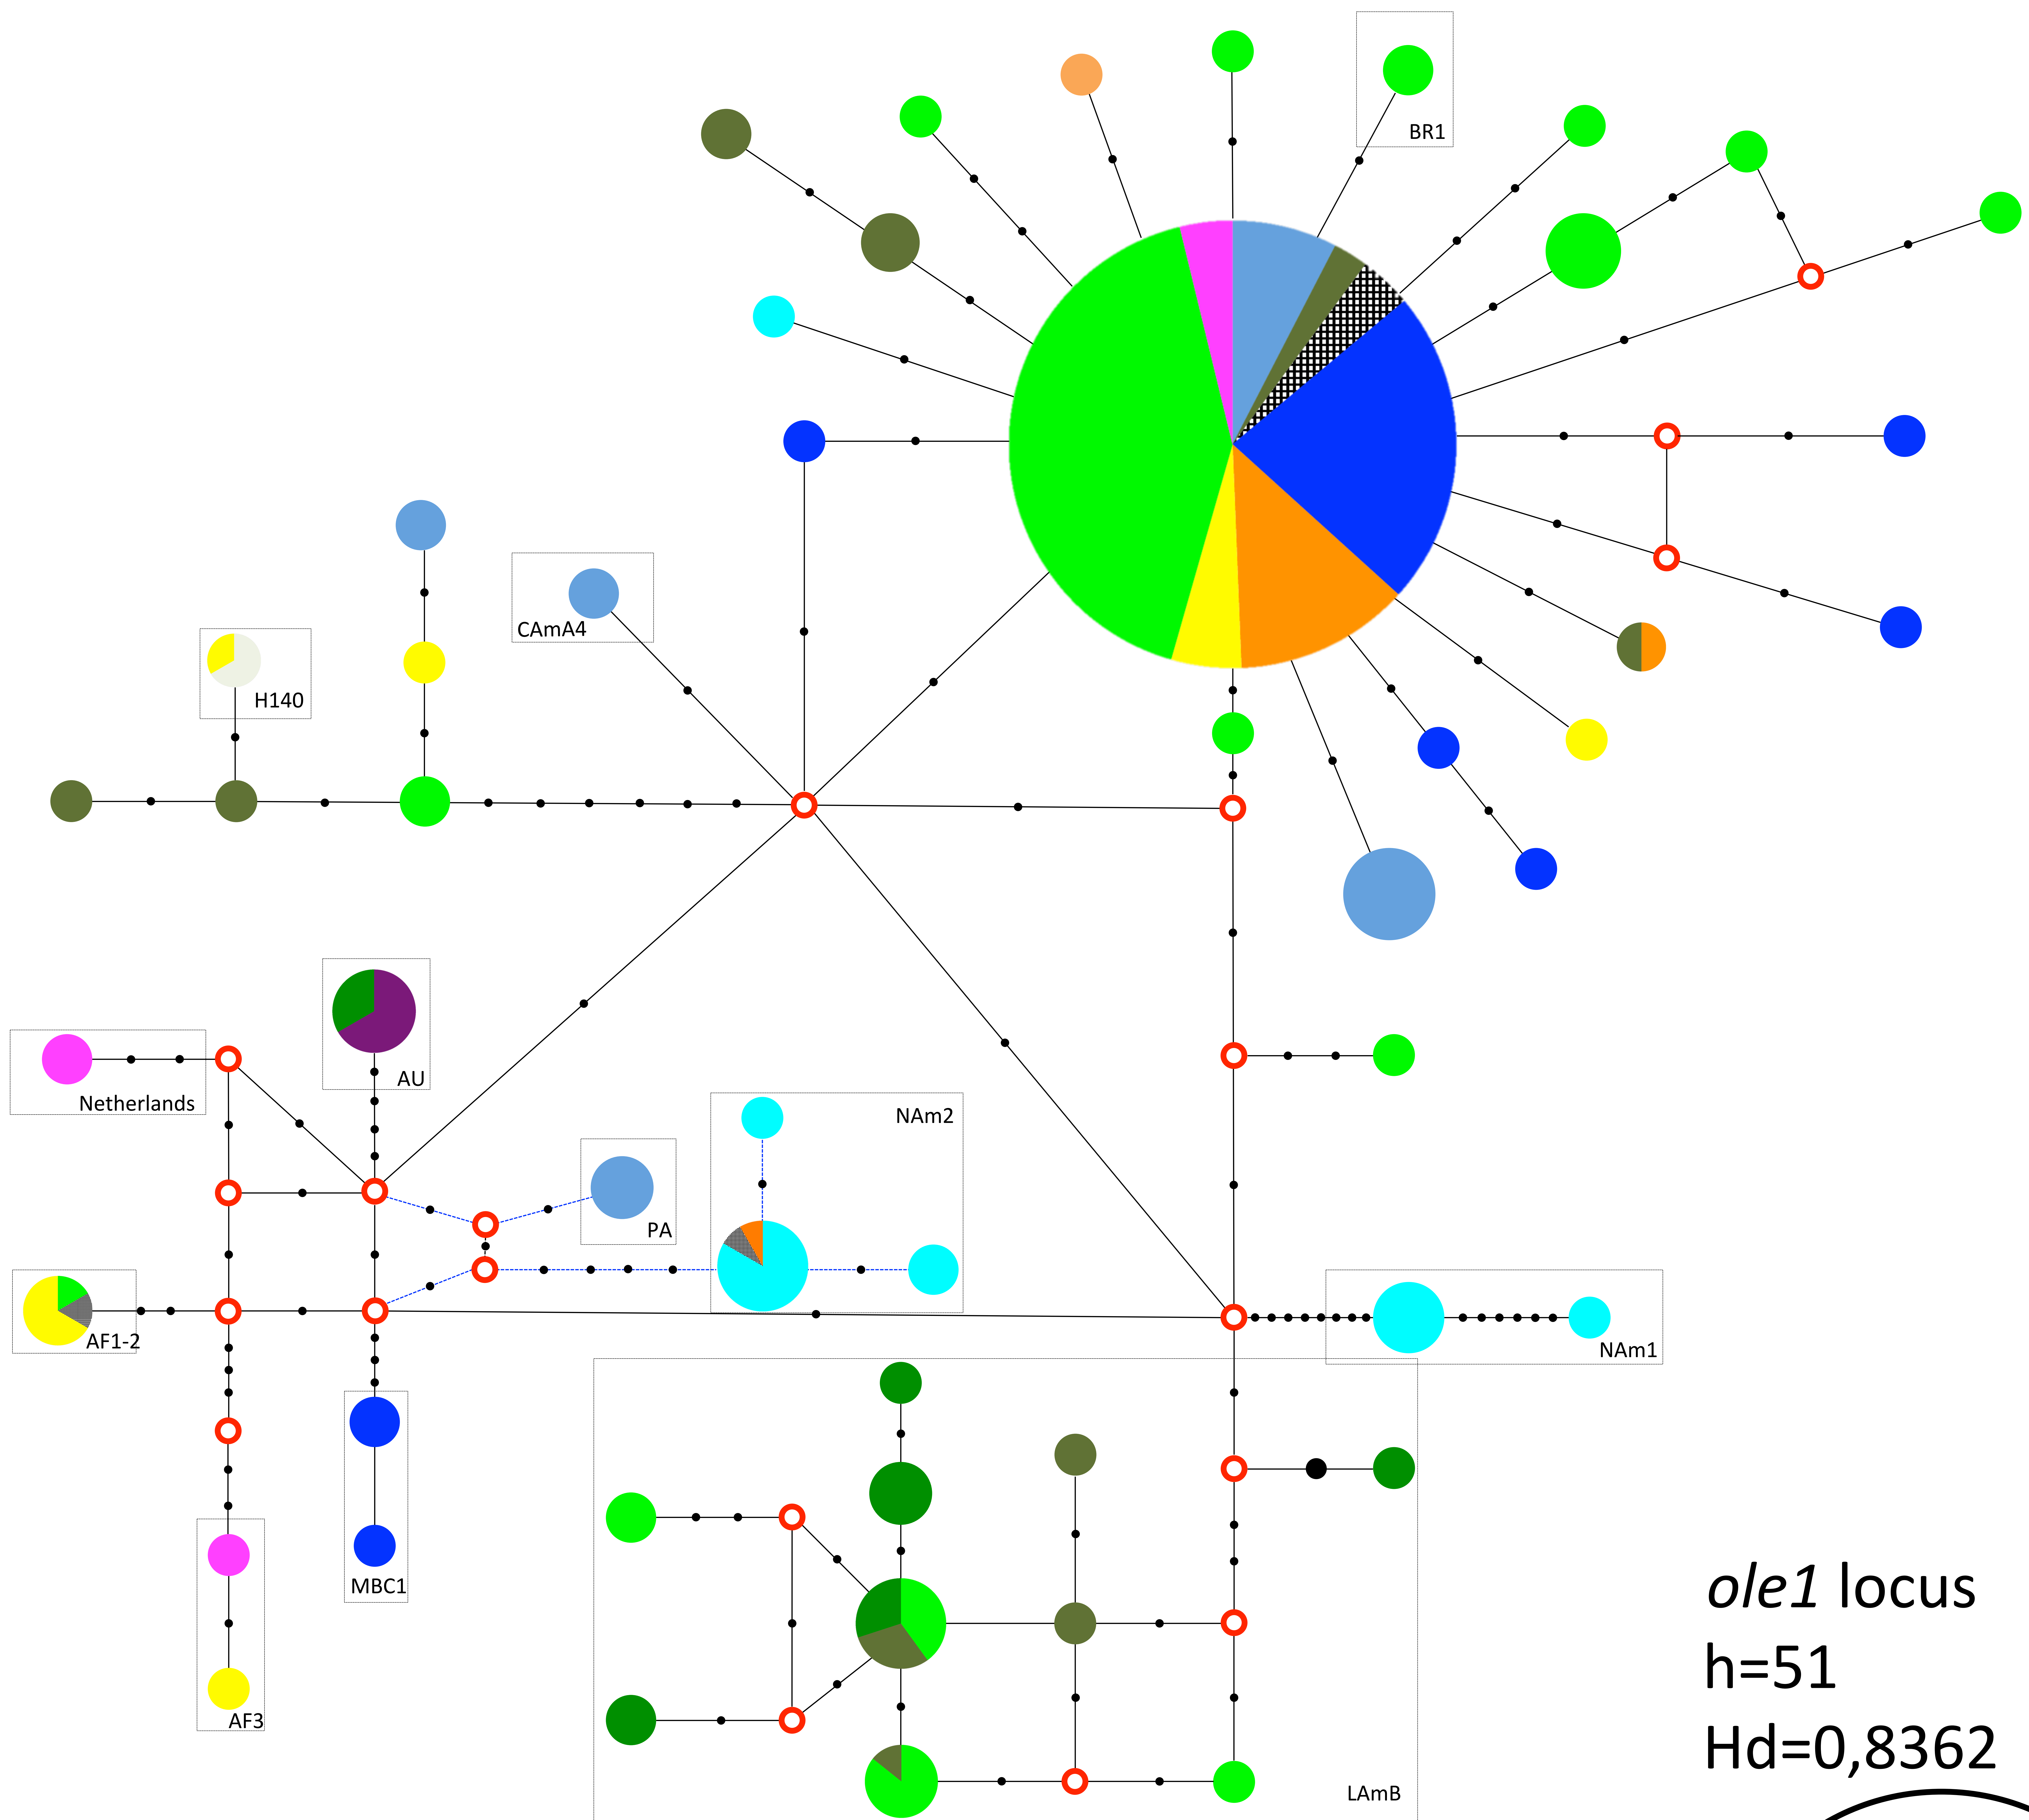

*ole1* locus  
 $h=51$   
 $Hd=0,8362$

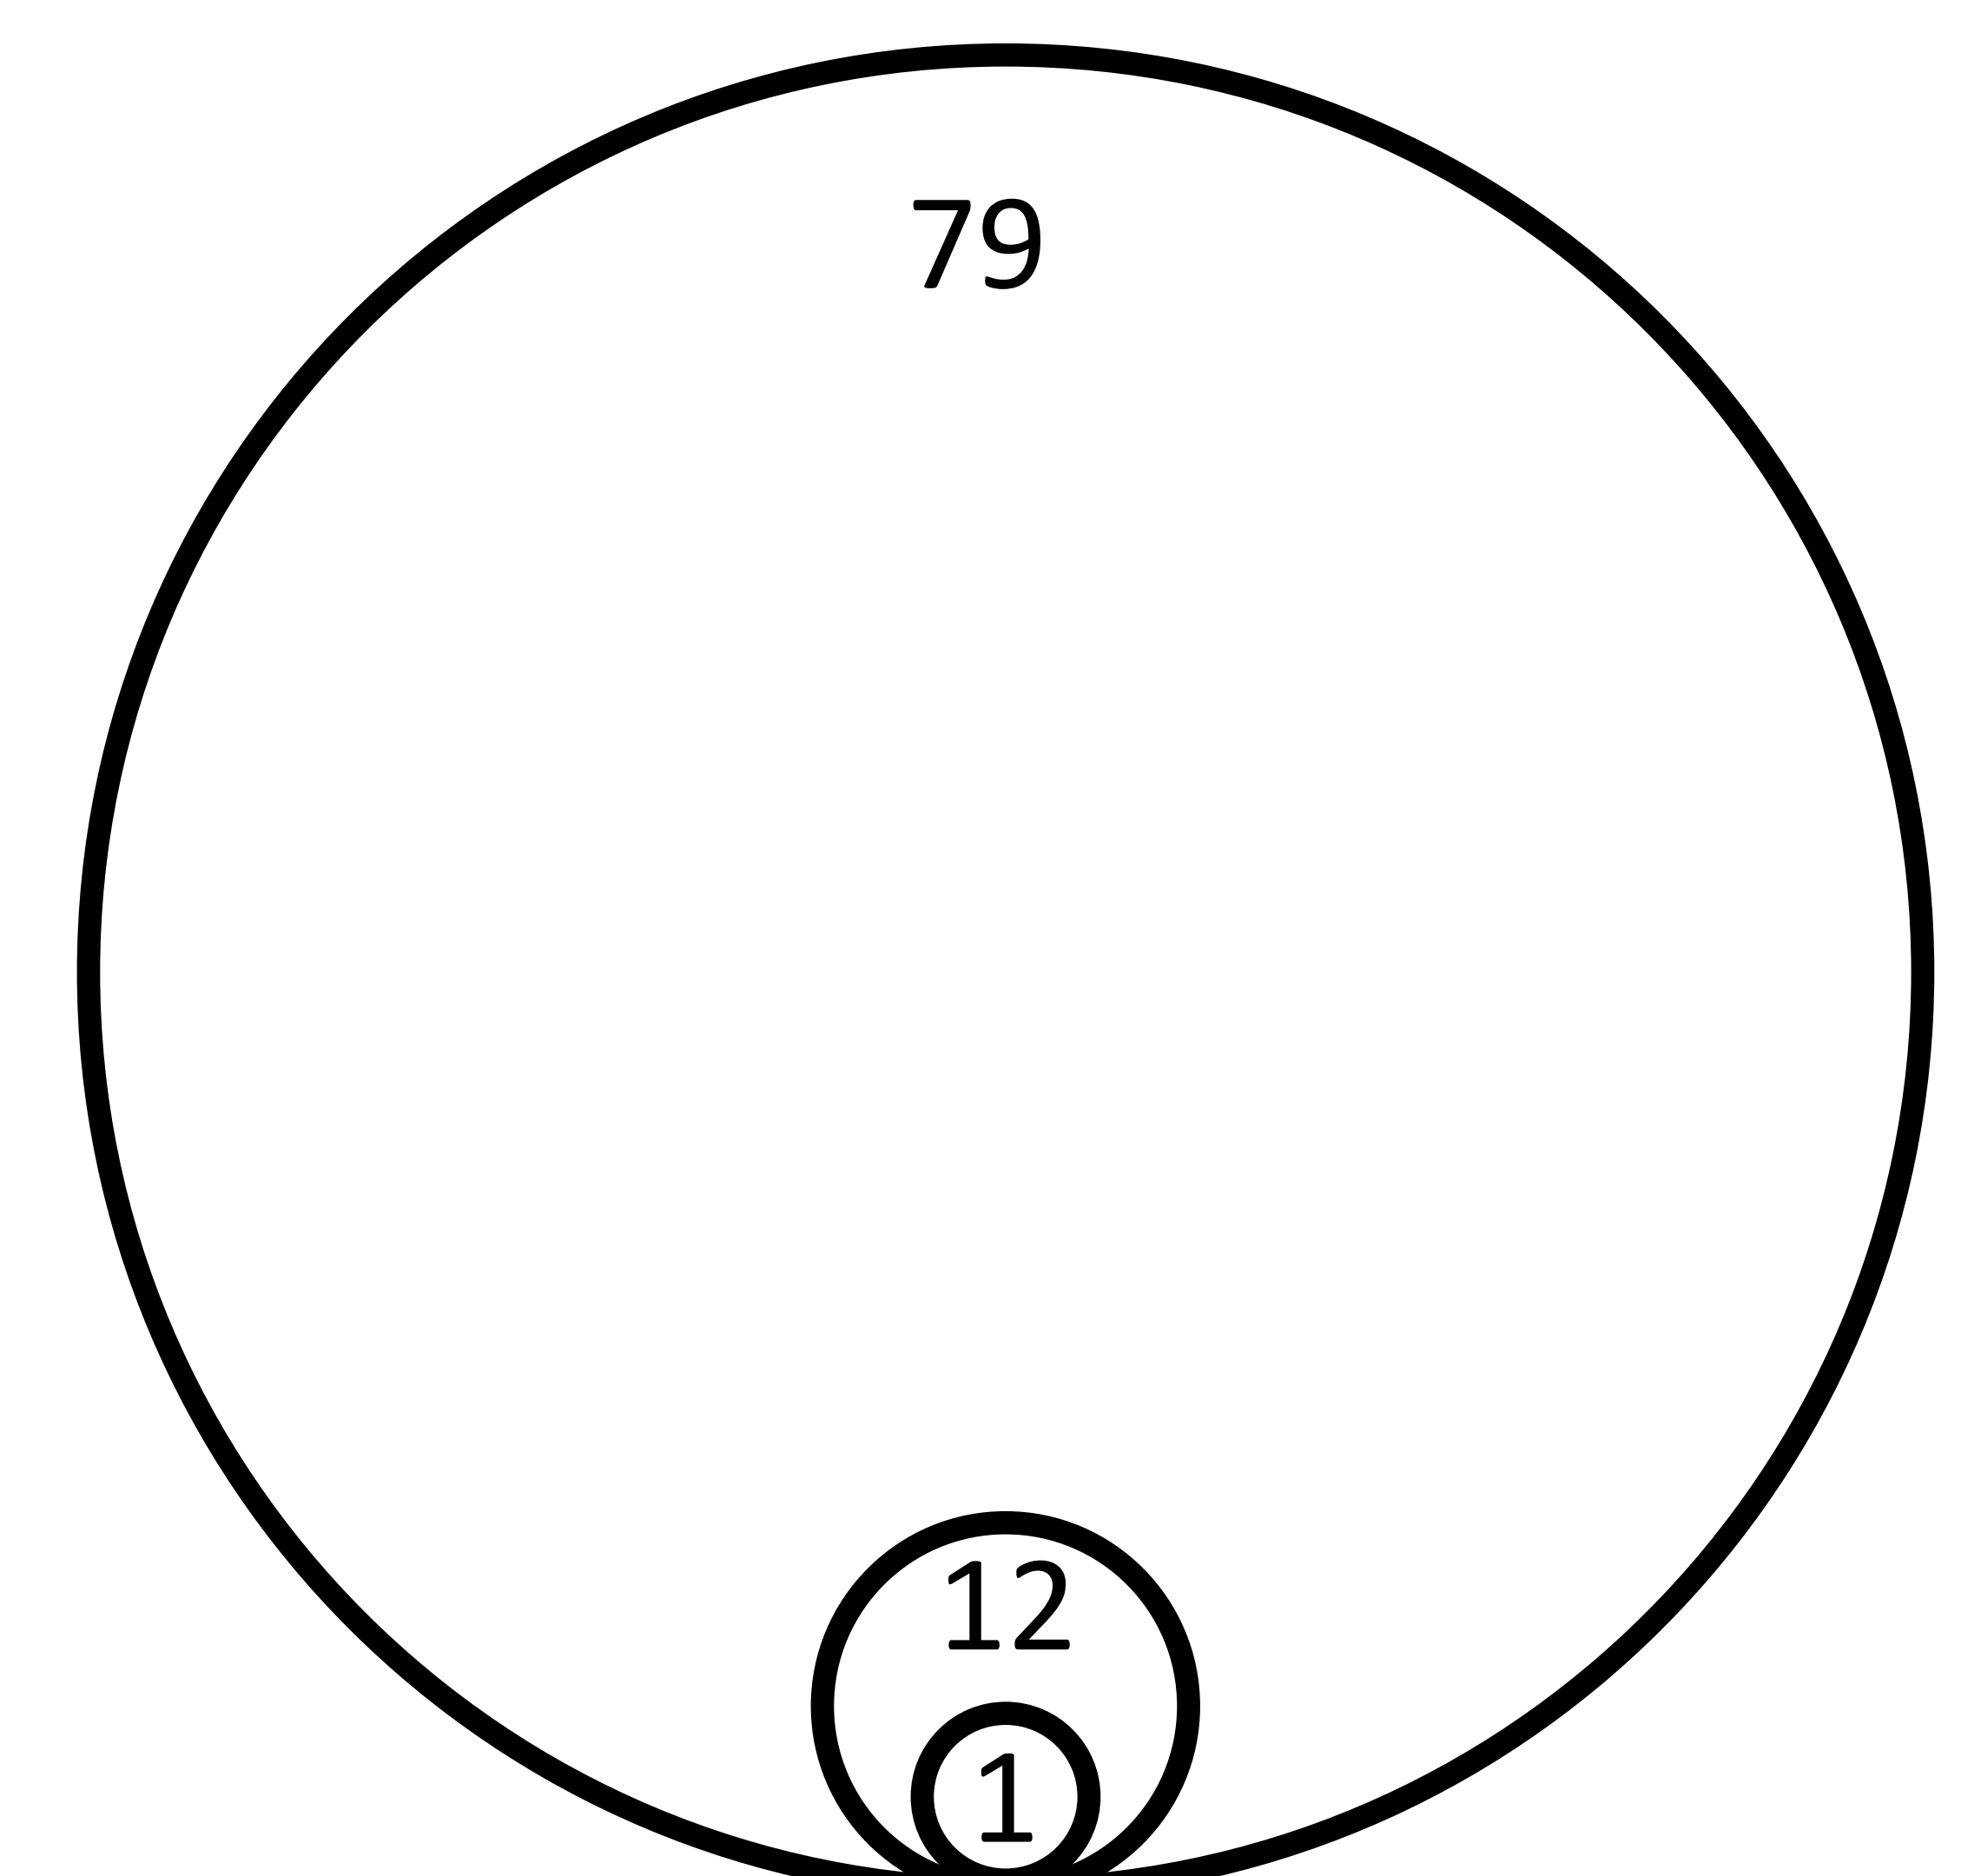

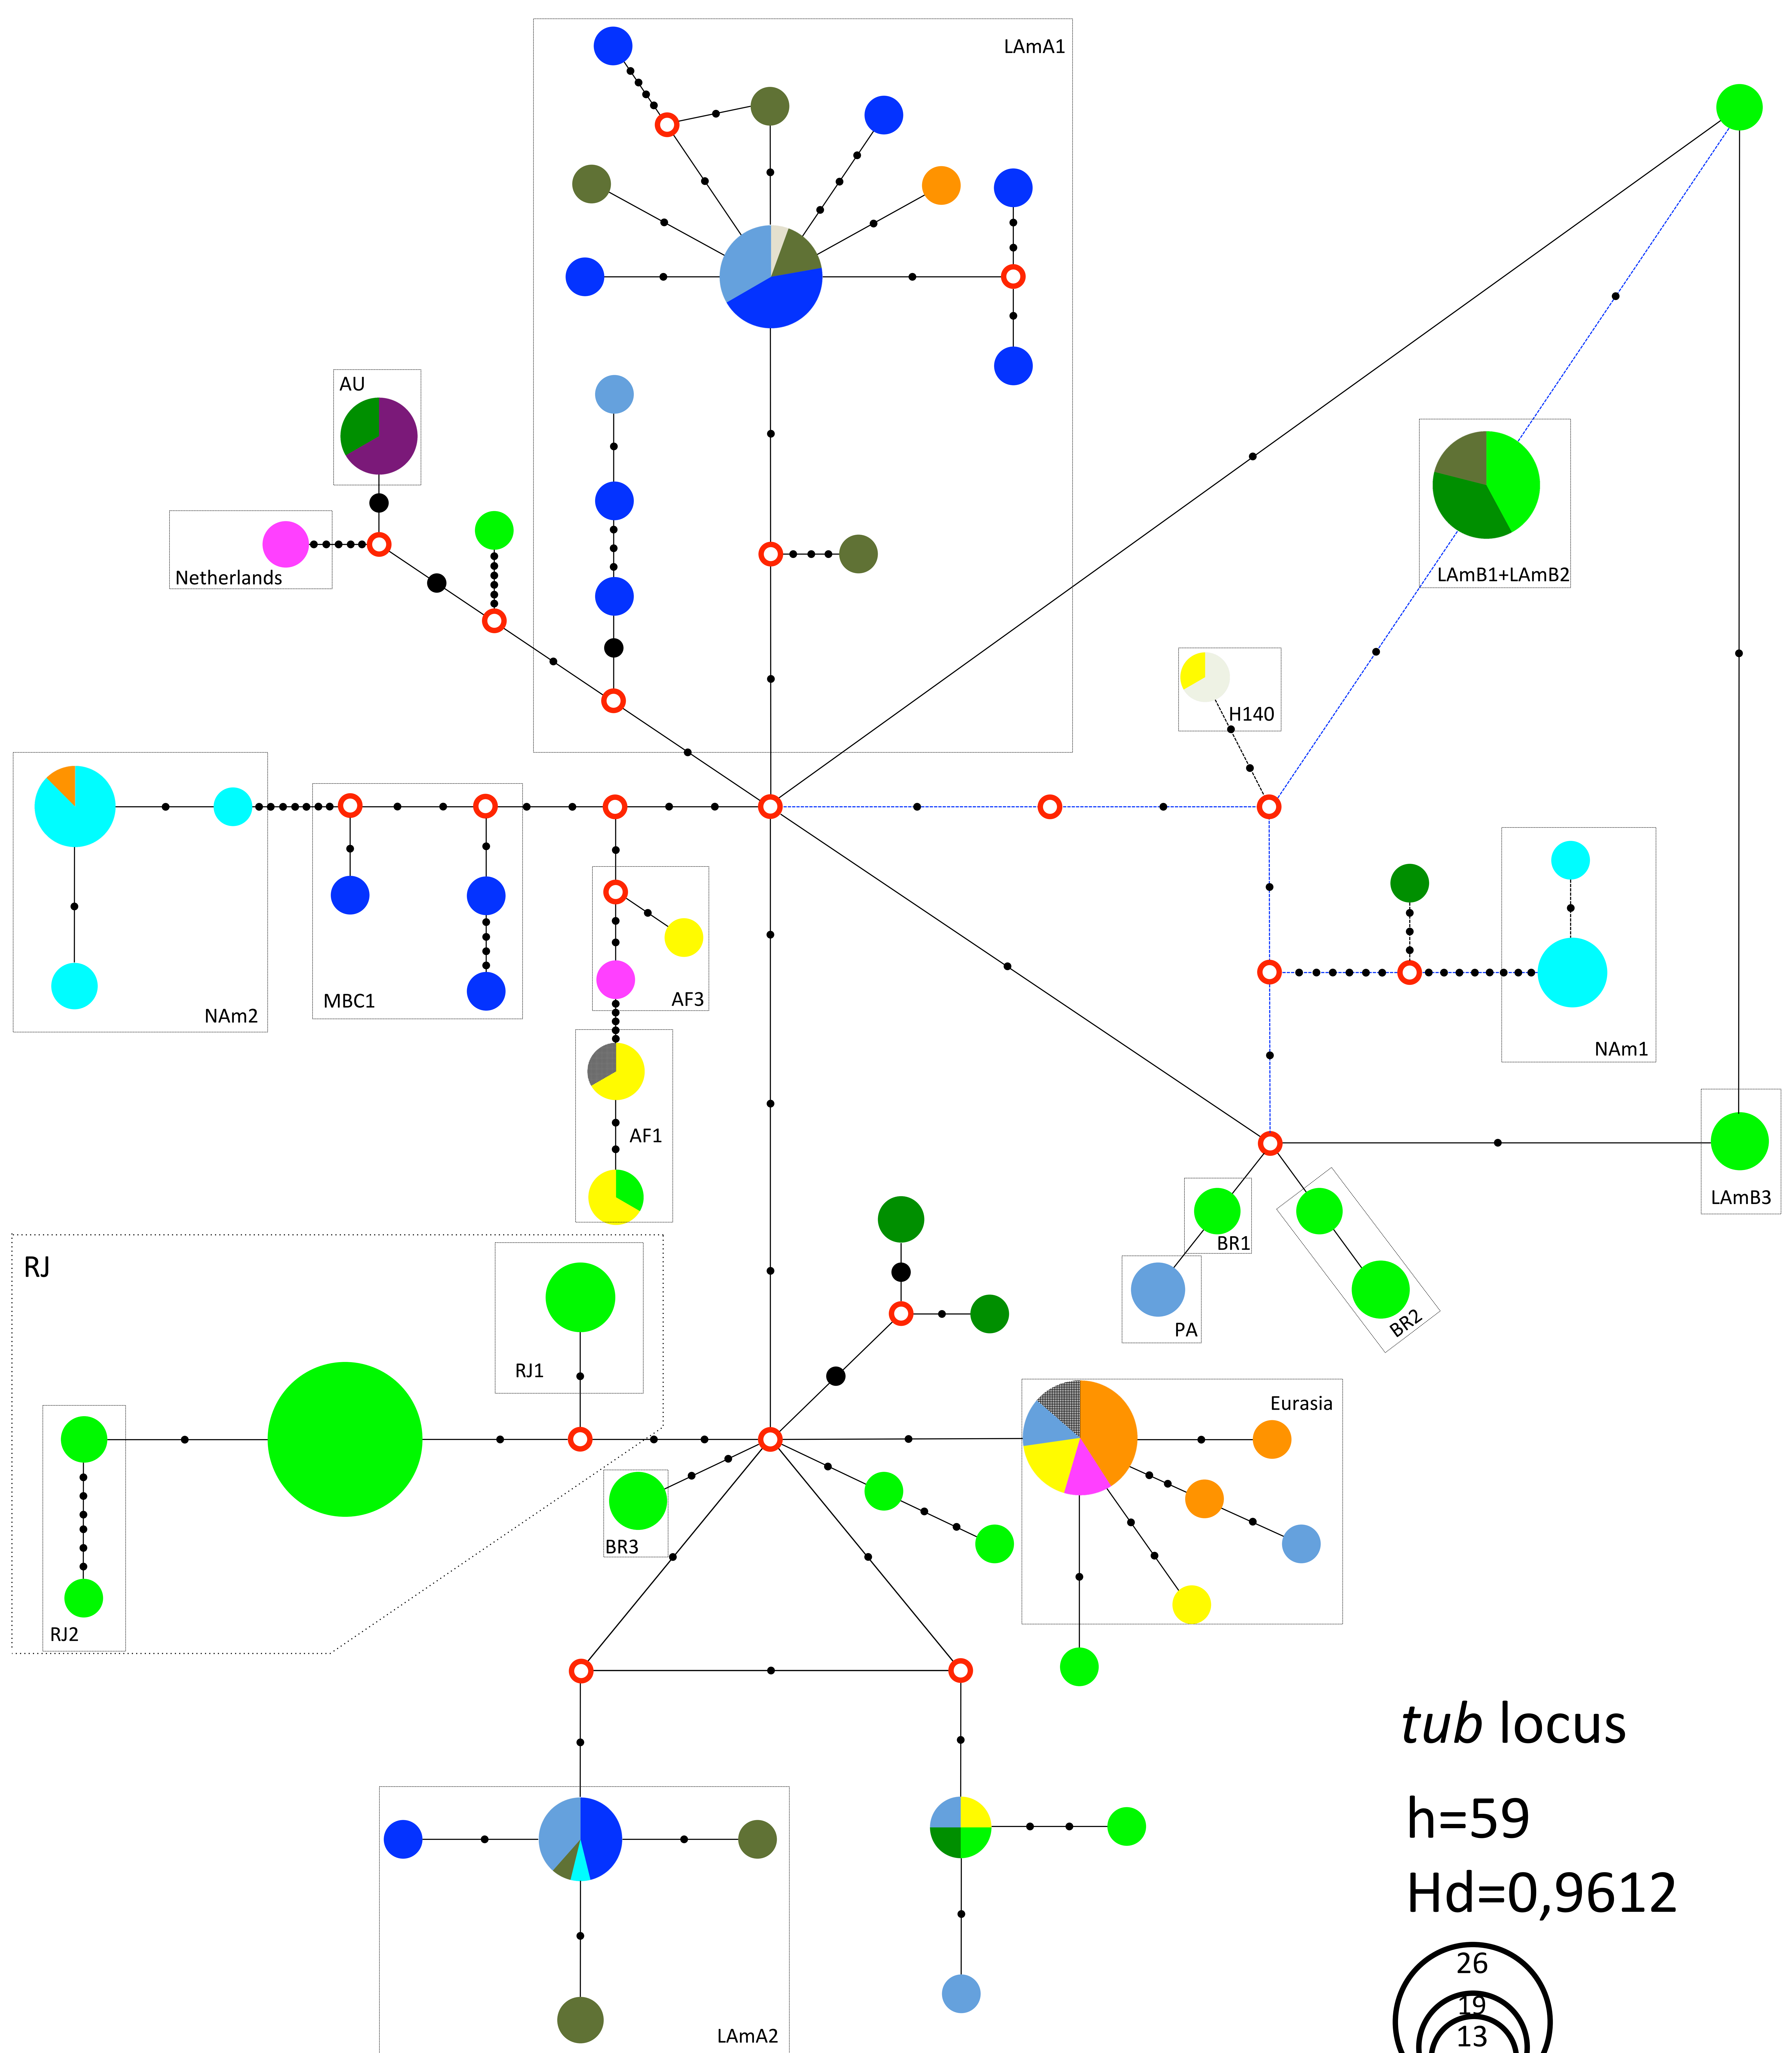

*tub* locus

$h=59$

$Hd=0,9612$

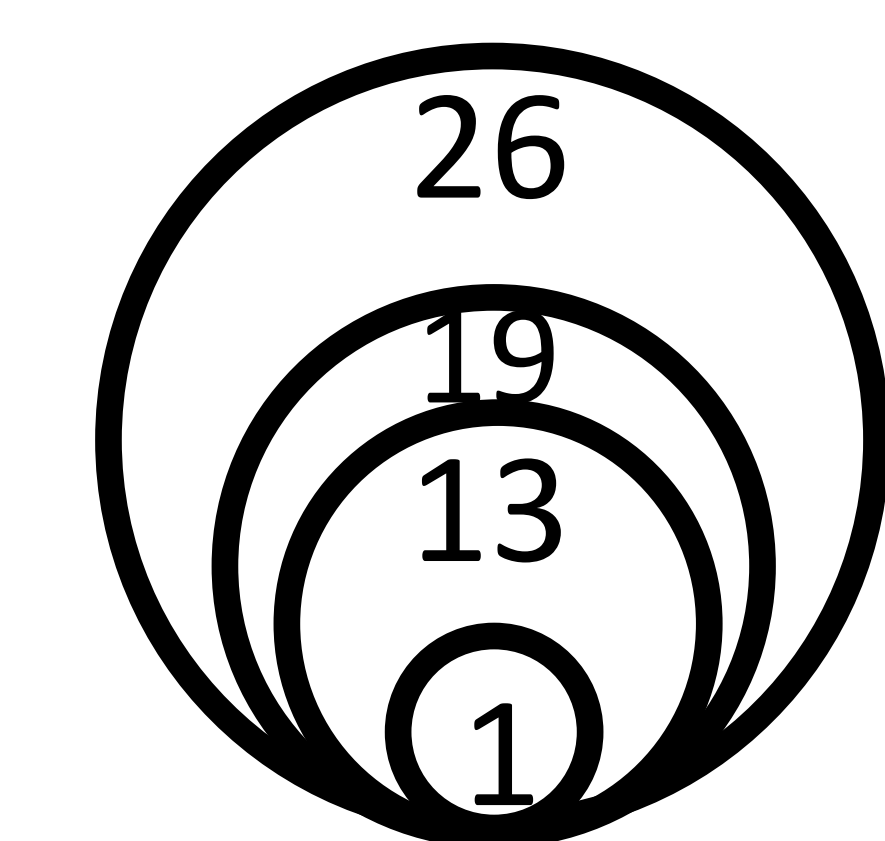

Supplement: pntd.0004732.s001.pdf [file pntd.0004732.s001.pdf]
