# Supplementary material for: Worldwide Phylogenetic Distributions and Population Dynamics of the Genus Histoplasma
Source: PubMed Central journal article supplement (PMC4889077; doi:10.1371/journal.pntd.0004732), 2016-06-01

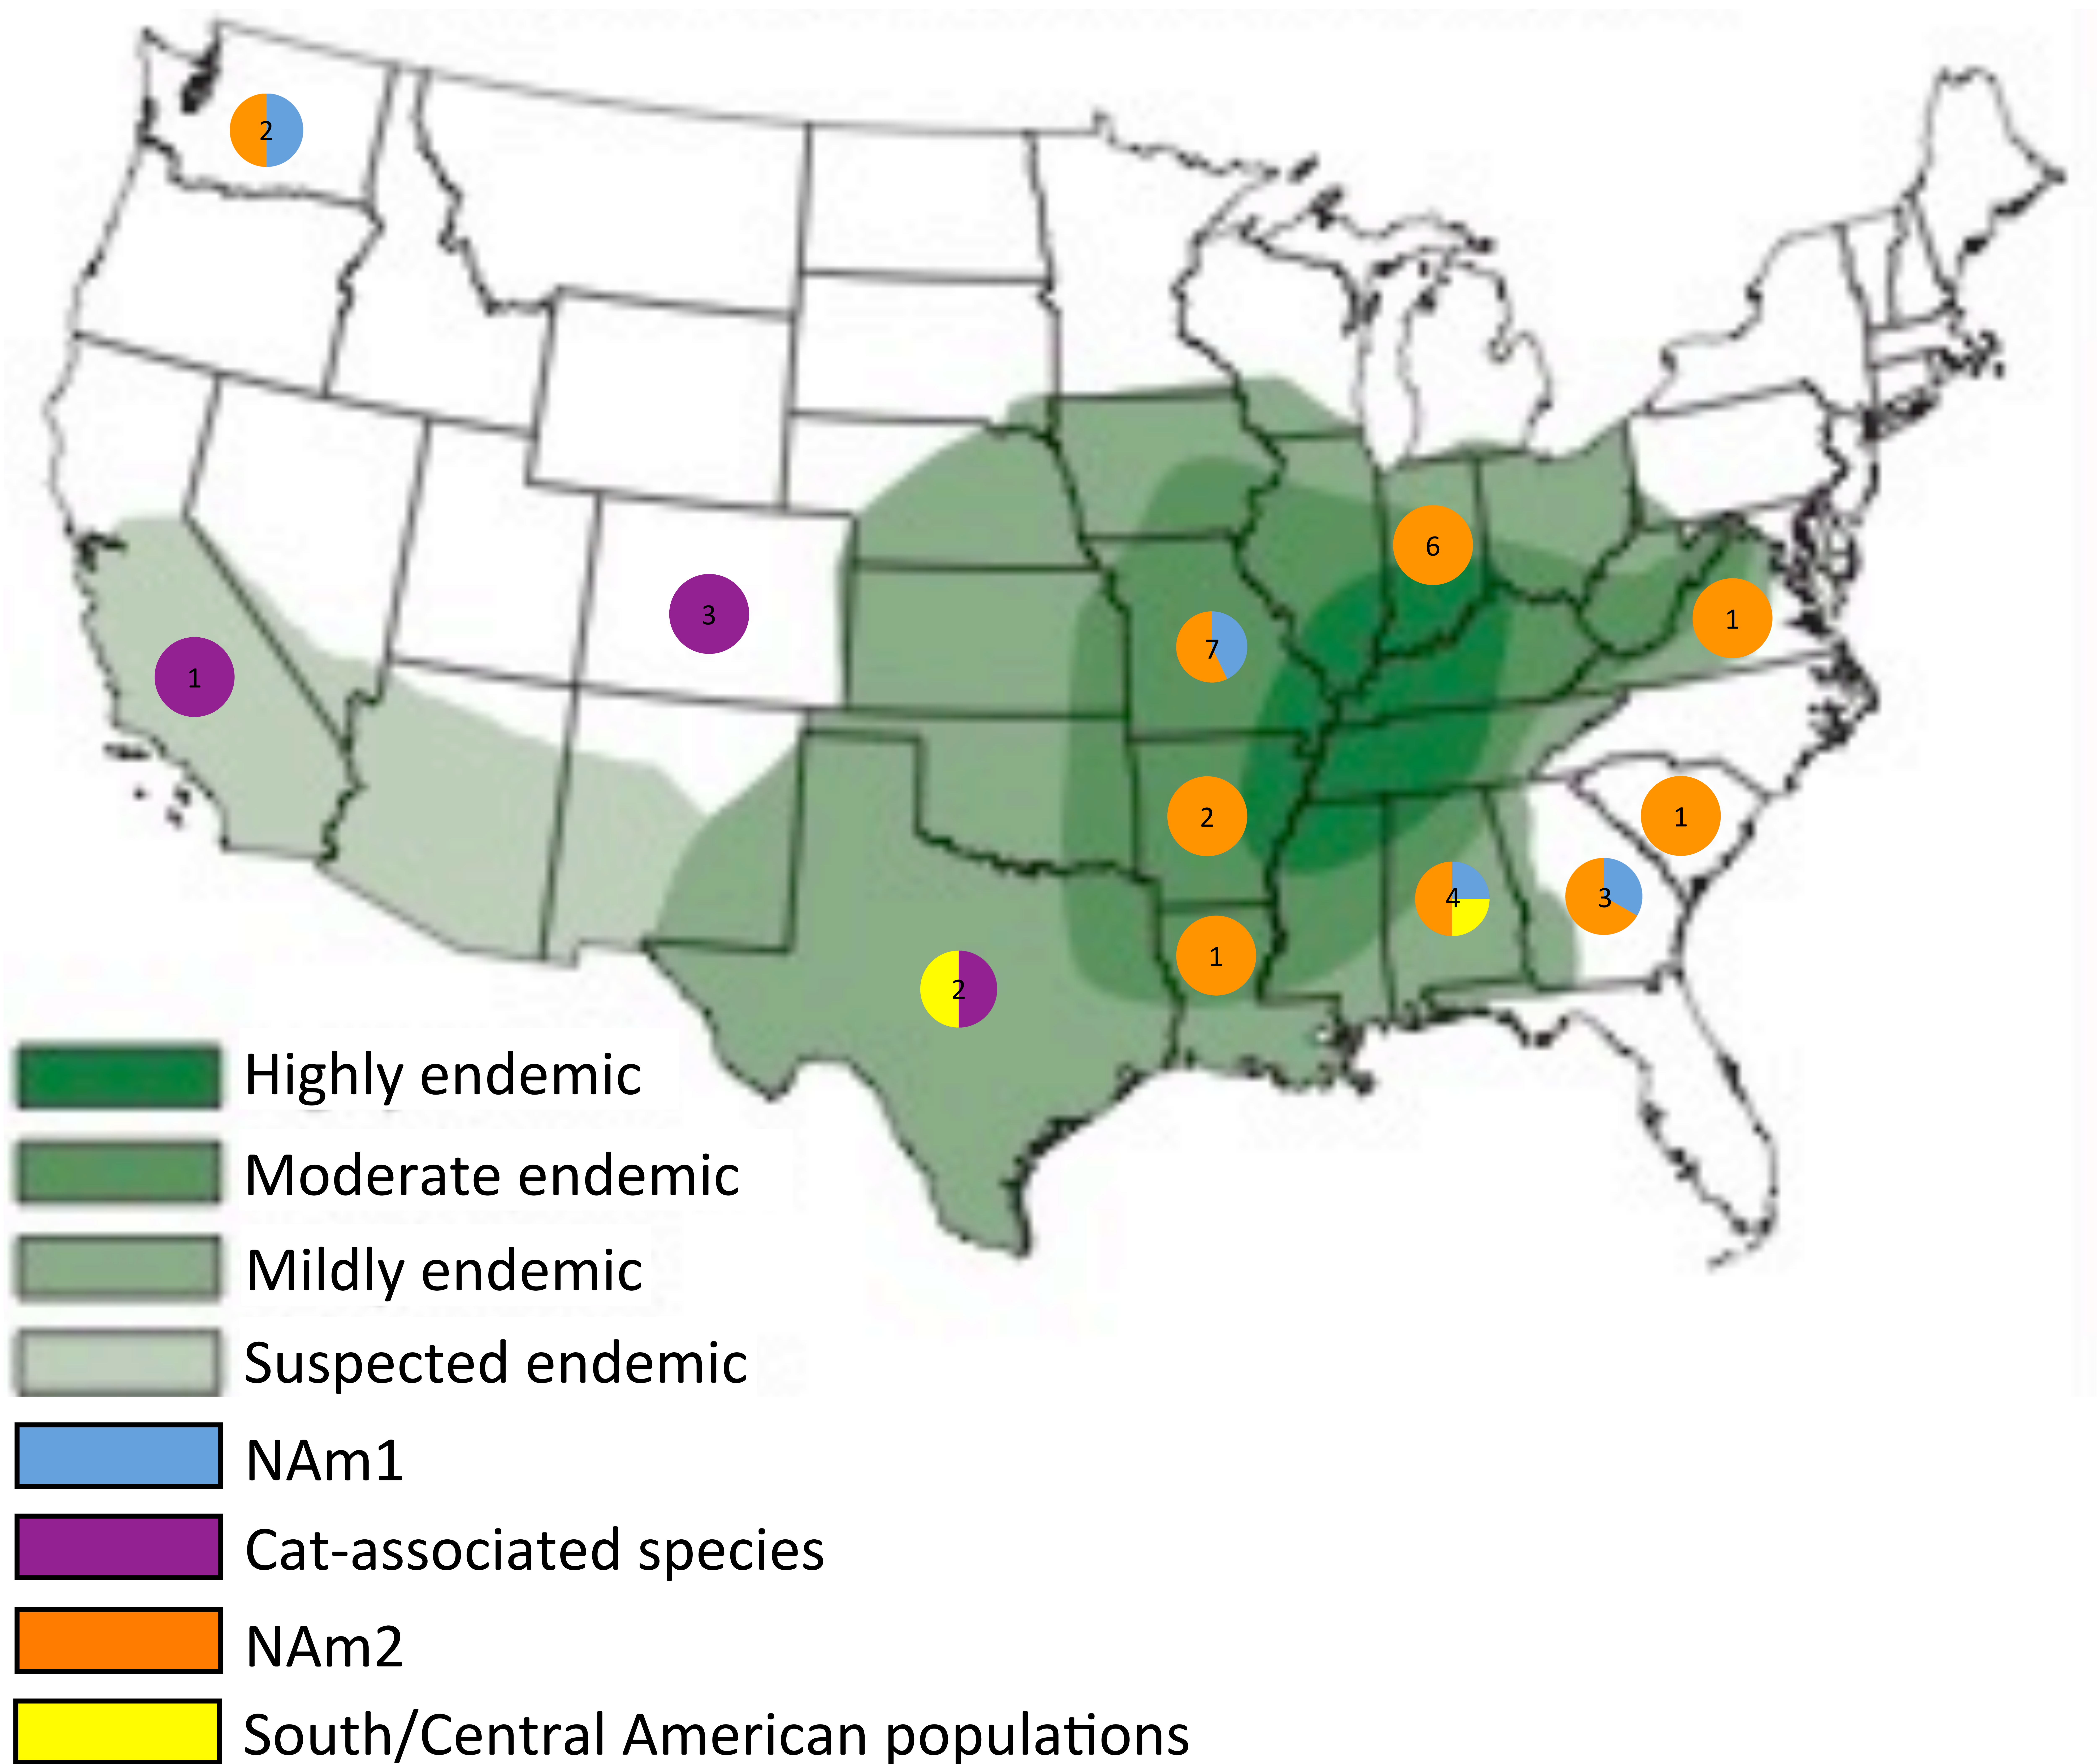

Supplement: pntd.0004732.s002.pdf [file pntd.0004732.s002.pdf]
